# Supplementary material for: Rapid genetic and phenotypic changes in Pseudomonas aeruginosa clinical strains during ventilator-associated pneumonia
Source: PubMed Central journal article supplement (PMC6423012; doi:10.1038/s41598-019-41201-5), 2019-03-18
Supplement: 41598_2019_41201_MOESM1_ESM.pdf [file 41598_2019_41201_MOESM1_ESM.pdf]

## **Rapid genetic and phenotypic changes in *Pseudomonas aeruginosa* clinical strains during ventilator-associated pneumonia**

Elise Persyn<sup>1,2</sup>, Mohamed Sassi<sup>3</sup>, Marc Aubry<sup>4</sup>, Martin Broly<sup>2</sup>, Sandie Delanou<sup>1</sup>, Karim Asehnoune<sup>1,2</sup>, Nathalie Caroff<sup>1</sup>, Lise Crémet<sup>1,2</sup>

<sup>1</sup>EA3826 Université de Nantes, IRS2 Nantes Biotech

<sup>2</sup> CHU Nantes, 9 quai Moncousu, Nantes Cedex 1, F-44093 France

<sup>3</sup>Inserm U835, Université de Rennes

<sup>4</sup>Université de Rennes, CNRS, IGDR [(Institut de génétique et développement de Rennes)] - UMR

6290, F-35000 Rennes, France ; Université de Rennes, Plateforme GEH, CNRS, Inserm, BIOSIT - UMS

3480, US\_S 018, F-35000 Rennes, France

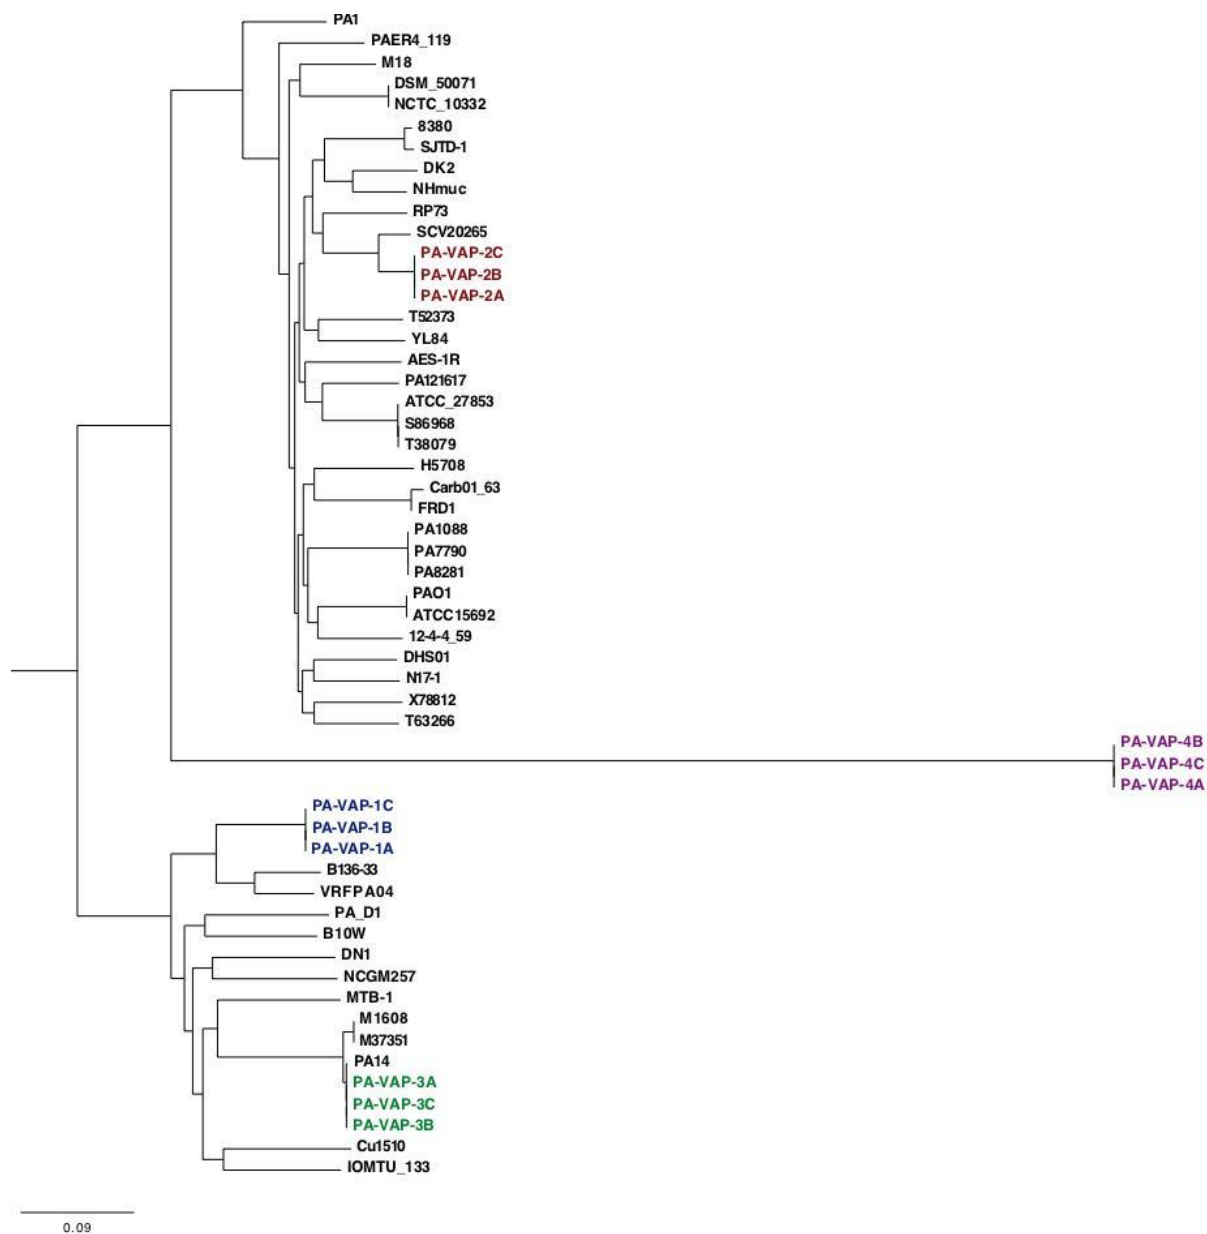

**Supplementary Figure S1.** Phylogenetic analysis of the 12 isolates and 43 *P. aeruginosa* genomes
